# Supplementary material for: Variation of Deoxynivalenol levels in Corn and Its Products Available in Retail Markets of Punjab, Pakistan and Estimation of Risk Assessment
Source: Preprints.org preprint supplement (doi:10.20944/preprints202103.0378.v1), 2021-03-15
Supplement: Supplementary file 3 [file supplementary]

Figure 1a; The standard curve of DON
